# Supplementary material for: Validating saliva as a biological sample for cost-effective, rapid and routine screening for SARS-CoV-2
Source: bioRxiv or medRxiv preprint supplement (doi:10.1101/2022.02.07.22269889), 2022-02-08
Supplement: Supplementary file [file media-2.pdf]

## Validating saliva as a biological sample for cost-effective, rapid and routine screening for SARS-CoV-2

B.R. Ansil, Carolin Elizabeth George, Sindhulina Chandrasingh, Ashwin Viswanathan, Mukund Thattai, Padinjat Raghu, Santhosha Devadiga, Arun Geetha Harikumar, Pulleri Kandi Harsha, Indu Nair, Uma Ramakrishnan, Satyajit Mayor

**Supplementary Table 1:** Binomial Generalized linear model (GLM) results for the variables expected to be associated with result agreement between paired N/OPS and saliva samples. Only 'storage (3-15 days)' emerged as a significant variable for result agreement between paired samples. Storage of prospective samples for more than two days significantly reduces the result agreement.

|                             | Estimate  | Standard error | z value | Pr(> z )      |
|-----------------------------|-----------|----------------|---------|---------------|
| <b>(Intercept)</b>          | 1.345922  | 1.035721       | 1.3     | 0.194         |
| <b>Sex (Male)</b>           | -0.312578 | 0.477695       | -0.654  | 0.513         |
| <b>Age</b>                  | -0.004419 | 0.017493       | -0.253  | 0.801         |
| <b>Storage daybins 3-15</b> | -1.216768 | 0.542706       | -2.242  | <b>0.025*</b> |
| <b>Severity</b>             | 0.265303  | 0.58228        | 0.456   | 0.649         |
